# Supplementary material for: Addition of Vitamin A Intake Data during Compartmental Modeling of Retinol Kinetics in Theoretical Humans Leads to Accurate Prediction of Vitamin A Total Body Stores and Kinetic Parameters in Studies of Reasonable Duration
Source: PubMed Central journal article supplement (PMC6825818; doi:10.1093/jn/nxz112), 2019-06-12
Supplement: nxz112_supplemental_file.pdf [file nxz112_supplemental_file.pdf]

**Supplemental Table 1** Assigned values for demographics plus reference values for state variables and retinol kinetic parameters for 12 theoretical subjects<sup>1</sup>

| Group                       | Children |          |          |          | Younger adults |          |          |          | Older adults |          |          |           |
|-----------------------------|----------|----------|----------|----------|----------------|----------|----------|----------|--------------|----------|----------|-----------|
| Subject ID                  | C1       | C2       | C3       | C4       | Y5             | Y6       | Y7       | Y8       | O9           | O10      | O11      | O12       |
| Demographics                |          |          |          |          |                |          |          |          |              |          |          |           |
| Age, y                      | 0.5      | 1        | 3        | 5        | 30             | 24       | 22       | 35       | 50           | 45       | 55       | 60        |
| BW, kg                      | 8        | 11       | 13       | 20       | 50             | 65       | 60       | 80       | 45           | 75       | 70       | 68        |
| [ROH] <sub>p</sub> , μmol/L | 0.8      | 1.2      | 1.3      | 1.1      | 1.25           | 1.5      | 1.4      | 1.8      | 1.35         | 1.65     | 1.2      | 1.75      |
| State variables             |          |          |          |          |                |          |          |          |              |          |          |           |
| U(1), μmol/d                | 0.5284   | 1.098    | 1.541    | 4.391    | 1.221          | 2.080    | 3.994    | 3.324    | 1.661        | 3.644    | 3.040    | 3.214     |
| M(5), μmol                  | 0.3200   | 0.6600   | 0.8450   | 1.100    | 2.175          | 4.240    | 3.650    | 5.570    | 2.640        | 5.380    | 3.650    | 5.180     |
| M(6), μmol                  | 27.85    | 333.8    | 800.9    | 1052     | 138.4          | 278.0    | 484.8    | 940.7    | 407.3        | 1151     | 664.4    | 2768      |
| M(7), μmol                  | 2.534    | 7.918    | 27.52    | 52.12    | 64.43          | 24.33    | 80.18    | 97.72    | 41.67        | 221.6    | 27.18    | 255.2     |
| TBS, μmol                   | 30.38    | 341.7    | 828.4    | 1104     | 202.9          | 302.3    | 565.0    | 1038     | 449.0        | 1372     | 691.6    | 3023      |
| DR, μmol/d                  | 0.3964   | 0.8236   | 1.156    | 3.294    | 0.9158         | 1.561    | 2.996    | 2.494    | 1.246        | 2.734    | 2.281    | 2.411     |
| Days of stores              | 76.65    | 414.94   | 716.4    | 335.2    | 221.5          | 193.7    | 188.6    | 416.4    | 360.3        | 502.0    | 303.2    | 1254      |
| Kinetic parameters          |          |          |          |          |                |          |          |          |              |          |          |           |
| L(2,1), d <sup>-1</sup>     | 28.34    | 43.58    | 37.18    | 39.03    | 28.30          | 33.16    | 60.52    | 50.94    | 46.2         | 49.55    | 28.38    | 62.93     |
| L(0,1), d <sup>-1</sup>     | 9.438    | 14.5     | 12.38    | 13.00    | 9.422          | 11.04    | 20.15    | 16.96    | 15.39        | 16.50    | 9.450    | 20.96     |
| L(5,2), d <sup>-1</sup>     | 0.2934   | 0.4764   | 0.2133   | 0.4049   | 0.2885         | 0.4172   | 0.8233   | 0.5393   | 0.5007       | 0.5528   | 0.2812   | 0.6766    |
| DT(3), d                    | 0.2559   | 0.1862   | 0.1469   | 0.2008   | 0.2255         | 0.2436   | 0.1397   | 0.1743   | 0.2343       | 0.1813   | 0.1939   | 0.2176    |
| L(5,4), d <sup>-1</sup>     | 2.156    | 2.663    | 3.239    | 1.439    | 1.687          | 2.008    | 0.9169   | 1.099    | 1.964        | 0.6821   | 1.241    | 0.6081    |
| MST <sub>RBP</sub> , h      | 18.96    | 14.58    | 12.22    | 22.73    | 21.33          | 19.24    | 30.32    | 26.96    | 18.88        | 40.51    | 25.69    | 45.45     |
| L(6,5), d <sup>-1</sup>     | 2.666    | 6.900    | 30.03    | 22.53    | 2.059          | 4.087    | 2.838    | 3.508    | 4.766        | 5.632    | 2.763    | 5.587     |
| L(5,6), d <sup>-1</sup>     | 0.01640  | 0.01117  | 0.03024  | 0.02042  | 0.02573        | 0.05673  | 0.01519  | 0.01812  | 0.02783      | 0.02395  | 0.01174  | 0.009585  |
| L(7,5), d <sup>-1</sup>     | 12.56    | 10.1     | 39.85    | 21.72    | 9.243          | 9.037    | 3.812    | 3.490    | 15.47        | 5.529    | 3.061    | 4.937     |
| L(5,7), d <sup>-1</sup>     | 1.586    | 0.8420   | 1.223    | 0.4583   | 0.3120         | 1.574    | 0.1735   | 0.1989   | 0.9800       | 0.1342   | 0.4111   | 0.1002    |
| L(10,6), d <sup>-1</sup>    | 0.01423  | 0.002467 | 0.001444 | 0.003131 | 0.006615       | 0.005615 | 0.006180 | 0.002651 | 0.003060     | 0.002376 | 0.003433 | 0.0008711 |

<sup>1</sup>Values for the demographics age, body weight (BW), and plasma retinol concentration {[ROH]<sub>p</sub>} were assigned based on information in the literature; see specifics for each group below. State variables include dietary vitamin A intake [U(1); Figure 1], compartment masses [M(I)], total body stores [TBS = M(6) + M(7)], disposal rate [DR = L(10,6) × M(6)], and days of vitamin A stores calculated as TBS / DR. Plasma retinol pool size [M(5)] was calculated using the assigned values for [ROH]<sub>p</sub> and BW as [ROH]<sub>p</sub> (μmol/L) × estimated plasma volume (L), where plasma volume was estimated as BW (kg) × 0.05 L/kg for the 4 children (Supplemental Reference 1) and BW (kg) × 0.045 L/kg for the 8 adults (Supplemental Reference 2). Kinetic parameters are fractional transfer coefficients [L(I,J)s] or fraction of retinol in compartment J transferred to compartment I each day; the delay time in component 3 [DT(3)]; and mean sojourn time to retinol-binding protein (MST<sub>RBP</sub>), or the mean of the distribution of times for a retinol molecule entering compartment 1 to arrive in plasma compartment 5 bound to retinol-binding protein, calculated as [L(2,1)<sup>-1</sup> + L(3,2)<sup>-1</sup> + DT(3) + L(5,4)<sup>-1</sup>] × 24. For compartmental analysis, L(3,2) = L(2,1); DN(3) = 8 where DN is delay number; L(4,3) = 1; and L(5,2) was generated to be ~1% of L(2,1) (28). The model is shown in Figure 1.

Following are notes on information used to generate demographics, state variables, and kinetic parameters for the 3 groups of theoretical subjects:

For the 4 children: C1: low vitamin A intake with low/marginal vitamin A status adapted from (15,16,Supplemental Reference 3); C2: adequate intake (29) and adequate status using information from (16); C3: composite based on a group of Mexican children with adequate vitamin A intake and adequate/high vitamin A status (17); C4: high intake [above the upper limit for this age (29)] with high vitamin A status using results adapted from a group of Filipino children (Marjorie J. Haskell and Reina Engle-Stone, University of California, Davis; personal communication) as well as Mexican children of preschool-age (Veronica Lopez-Teros, Universidad de Sonora, Mexico; personal communication); retinol kinetics for these groups were analyzed using compartmental analysis (Jennifer L. Ford and Michael H. Green, The Pennsylvania State University; unpublished results).

For the 4 younger adults: Y5: low vitamin A intake that maintained low/marginal status adapted based on US and Bangladeshi adults studied in (18,19); Y6: composite based on a group of previously-studied European young adults with moderate intake and adequate status (Supplemental Reference 4,20) for which kinetics were adapted from (21); Y7: composite based on a group of US young adult women with adequate vitamin A status and higher-than-average intake (5); S8: based on a US adult woman studied for 6 y (5) for whom tracer data [Figure 5A in (5)] were extracted and compartmental analysis was applied (Jennifer L. Ford, The Pennsylvania State University; unpublished results).

For the 4 older adults: O9: moderate vitamin A intake and adequate status based on Bangladeshi adults studied in (22); O10: average intake and adequate status adapted from one US adult male subject (18) whose kinetic data were analyzed using compartmental analysis (Michael H. Green and Jennifer L. Ford, The Pennsylvania State University; unpublished results); O11 and O12: composites based on older Chinese adults with adequate vitamin A intakes and adequate vitamin A status (O11) and older US adults with high vitamin A status (O12) originally studied in (8,9) and later analyzed in (7) using compartmental modeling.

**Supplemental Table 2** Reference values for additional kinetic parameters calculated for 12 theoretical subjects<sup>1</sup>

| Group                     | Children |         |         |         | Younger adults |         |        |        | Older adults |         |        |         |
|---------------------------|----------|---------|---------|---------|----------------|---------|--------|--------|--------------|---------|--------|---------|
| Subject ID                | C1       | C2      | C3      | C4      | Y5             | Y6      | Y7     | Y8     | O9           | O10     | O11    | O12     |
| Parameter                 |          |         |         |         |                |         |        |        |              |         |        |         |
| $\bar{t}(5)$ , d          | 0.06568  | 0.05882 | 0.01431 | 0.02260 | 0.08848        | 0.07620 | 0.1504 | 0.1429 | 0.04942      | 0.08960 | 0.1717 | 0.09502 |
| $\bar{t}(6)$ , d          | 32.64    | 73.30   | 31.56   | 42.45   | 30.91          | 16.04   | 46.80  | 48.14  | 32.37        | 37.98   | 65.88  | 95.63   |
| $\bar{t}(7)$ , d          | 0.6307   | 1.188   | 0.8174  | 2.182   | 3.205          | 0.6351  | 5.762  | 5.028  | 1.020        | 7.448   | 2.432  | 9.980   |
| $\bar{T}(5,5)$ , d        | 0.8073   | 0.8014  | 0.7308  | 0.3339  | 2.375          | 2.717   | 1.218  | 2.234  | 2.118        | 1.968   | 1.600  | 2.148   |
| $\bar{T}(6,5)$ , d        | 70.26    | 405.3   | 692.6   | 319.4   | 151.2          | 178.1   | 161.8  | 377.2  | 326.8        | 421.0   | 291.3  | 1148    |
| $\bar{T}(7,5)$ , d        | 6.394    | 9.614   | 23.80   | 15.82   | 70.36          | 15.59   | 26.76  | 39.19  | 33.44        | 81.05   | 11.91  | 105.9   |
| $\bar{T}(\text{SYS})$ , d | 77.46    | 415.7   | 717.1   | 335.5   | 223.9          | 196.4   | 189.8  | 418.6  | 362.4        | 504.0   | 304.8  | 1256    |
| $\nu(5)$                  | 11.29    | 12.62   | 50.06   | 13.78   | 25.84          | 34.65   | 7.102  | 14.63  | 41.86        | 20.96   | 8.319  | 21.61   |
| $\bar{t}\bar{t}(5)$ , d   | 6.789    | 32.87   | 14.31   | 24.34   | 8.572          | 5.589   | 26.55  | 28.46  | 8.606        | 23.94   | 36.44  | 58.02   |
| CO, d                     | 12       | 14      | 11      | 17      | 34             | 10      | 27     | 29     | 19           | 35      | 20     | 61      |

<sup>1</sup>Shown are reference values for kinetic parameters calculated using results from the model (Figure 1) fit to the full dataset (365 d) without inclusion of dietary vitamin A intake for theoretical children, younger adults, and older adults (n=4/group; see Supplemental Table 1). Calculated parameters include: transit times [ $\bar{t}(J)$ , or the mean of the distribution of times a retinol molecule spends in compartment J during a single transit, calculated as  $1/\sum L(I,J)$ s exiting compartment J] for retinol in plasma [ $\bar{t}(5)$ ] and in extravascular compartments 6 [ $\bar{t}(6)$ ] and 7 [ $\bar{t}(7)$ ]; mean residence times [ $\bar{T}(I,J)$ , or the mean of the distribution of times the tracer spends in compartment I after entering the system via compartment J, where J is compartment 5 for tracer that was absorbed] for retinol in plasma [ $\bar{T}(5,5)$ ], the extravascular compartments 6 and 7 [ $\bar{T}(6,5)$  and  $\bar{T}(7,5)$ , respectively], and the system [ $\bar{T}(\text{SYS})$ , equal to  $\bar{T}(5,5) + \bar{T}(6,5) + \bar{T}(7,5)$ ]; recycling number for plasma [ $\nu(5)$ , or the mean number of times a molecule of retinol recycles to plasma before being irreversibly lost, calculated as  $[\bar{T}(5,5) / \bar{t}(5)] - 1$ ]; recycling time to plasma [ $\bar{t}\bar{t}(5)$ , calculated as  $[\bar{T}(6,5) + \bar{T}(7,5)] / \nu(5)$ ]; and crossover (CO; day on which retinol specific activity in stores becomes greater than that in plasma, where specific activity = fraction of dose in plasma or stores / mass of vitamin A in plasma or stores, respectively). For more information on calculation of parameters, see (29).

**Supplemental Table 3** Vitamin A TBS predicted using different values for dietary vitamin A intake at the shortest study duration determined for theoretical subjects<sup>1</sup>

| Subject | Duration (d) | TBS ( $\mu\text{mol}$ ) using reference value DI | TBS ( $\mu\text{mol}$ ) using 50% DI (% $\Delta$ ) | TBS ( $\mu\text{mol}$ ) using 150% DI (% $\Delta$ ) |
|---------|--------------|--------------------------------------------------|----------------------------------------------------|-----------------------------------------------------|
| C1      | 10           | 27                                               | 39 (44)                                            | 15 (-44)                                            |
| C2      | 10           | 308                                              | 338 (9.7)                                          | 270 (-12)                                           |
| C3      | 10           | 856                                              | 878 (2.6)                                          | 830 (-3.0)                                          |
| C4      | 14           | 980                                              | 1071 (9.3)                                         | 882 (-10)                                           |
| Y5      | 35           | 197                                              | 233 (18)                                           | 168 (-15)                                           |
| Y6      | 10           | 306                                              | 324 (5.9)                                          | 284 (-7.2)                                          |
| Y7      | 28           | 558                                              | 703 (26)                                           | 417 (-25)                                           |
| Y8      | 28           | 1069                                             | 1173 (9.7)                                         | 946 (-12)                                           |
| O9      | 10           | 411                                              | 438 (6.6)                                          | 405 (-1.4)                                          |
| O10     | 42           | 1437                                             | 1607 (12)                                          | 1330 (-7.4)                                         |
| O11     | 21           | 616                                              | 733 (19)                                           | 508 (-18)                                           |
| O12     | 35           | 2975                                             | 3339 (12)                                          | 3043 (2.3)                                          |

<sup>1</sup>Shown are the shortest study durations required to accurately predict state variables, including TBS, and kinetic parameters (see Figure 3A) in theoretical children (C1 – C4), younger adults (Y5 – Y8), and older adults (O9 – O12)] as well as model-predicted TBS using the reference value for DI, 50% of the reference value for DI, and 150% of the reference value for DI. Also shown are values for percent changes (%  $\Delta$ ) in predicted TBS calculated using 50 or 150% of the reference value for DI compared to the reference value, calculated as  $[(\text{TBS using DI} - \text{TBS using 50 or 150\% DI}) / \text{TBS using DI}] \times 100$ . These results are shown graphically in Figure 4; subjects are described in Supplemental Table 1. DI, dietary intake; TBS, total body stores.

**Supplemental Table 4** Reference values for the RID coefficient *FaS* at 4, 7, and 14 d compared with model calculations done without and with dietary vitamin A intake data included in the model<sup>1</sup>

| Subject         | <i>FaS</i> 4d |                   |                   | <i>FaS</i> 7 d |                    |                   | <i>FaS</i> 14 d |                    |                    |
|-----------------|---------------|-------------------|-------------------|----------------|--------------------|-------------------|-----------------|--------------------|--------------------|
|                 | Reference     | -DI (% Δ)         | +DI (% Δ)         | Reference      | -DI (% Δ)          | +DI (% Δ)         | Reference       | -DI (% Δ)          | +DI (% Δ)          |
| C1              | 2.71          | 1.94 (-28)        | 2.67 (-1.5)       | 1.43           | 1.01 (-29)         | 1.40 (-2.1)       | 0.532           | 0.391 (-26)        | 0.523 (-1.7)       |
| C2              | 4.14          | 2.66 (-36)        | 4.07 (-1.7)       | 1.89           | 1.21 (-36)         | 1.85 (-2.1)       | 0.722           | 0.482 (-33)        | 0.717 (-0.7)       |
| C3              | 1.78          | 1.85 (3.9)        | 1.77 (-0.6)       | 0.926          | 0.965 (4.2)        | 0.925 (-0.1)      | 0.714           | 0.739 (3.5)        | 0.715 (0.1)        |
| C4              | 2.39          | 1.31 (-45)        | 2.34 (-2.1)       | 1.45           | 0.773 (-47)        | 1.42 (-2.1)       | 0.788           | 0.454 (-42)        | 0.777 (-1.4)       |
| <b>GM model</b> | <b>2.67</b>   | <b>1.65 (-38)</b> | <b>2.95 (10)</b>  | <b>1.40</b>    | <b>0.849 (-39)</b> | <b>1.53 (9.3)</b> | <b>0.661</b>    | <b>0.438 (-34)</b> | <b>0.729 (10)</b>  |
| Y5              | 1.41          | 1.11 (-21)        | 1.41 (0.0)        | 1.23           | 0.964 (-22)        | 1.24 (0.8)        | 0.977           | 0.761 (-22)        | 0.981 (0.4)        |
| Y6              | 1.45          | 1.45 (0.0)        | 1.48 (2.1)        | 0.838          | 0.833 (0.6)        | 0.843 (0.6)       | 0.649           | 0.646 (-0.5)       | 0.652 (0.5)        |
| Y7              | 2.07          | 1.59 (-23)        | 2.09 (1.0)        | 1.40           | 1.10 (-21)         | 1.45 (3.6)        | 1.00            | 0.764 (-24)        | 1.03 (3.0)         |
| Y8              | 2.13          | 1.89 (-11)        | 2.14 (0.5)        | 1.48           | 1.31 (-11)         | 1.48 (0.0)        | 1.03            | 0.907 (-12)        | 1.04 (1.0)         |
| <b>GM model</b> | <b>1.65</b>   | <b>1.32 (-20)</b> | <b>1.68 (1.8)</b> | <b>1.23</b>    | <b>0.953 (-22)</b> | <b>1.24 (0.8)</b> | <b>0.912</b>    | <b>0.691 (-24)</b> | <b>0.920 (0.9)</b> |
| O9              | 2.54          | 2.23 (-12)        | 2.36 (-7.1)       | 1.57           | 1.37 (-13)         | 1.45 (-7.6)       | 0.829           | 0.763 (-8.0)       | 0.795 (-4.1)       |
| O10             | 2.06          | 2.18 (5.8)        | 2.08 (1.0)        | 1.23           | 1.30 (5.7)         | 1.24 (0.8)        | 0.936           | 0.994 (6.2)        | 0.943 (0.7)        |
| O11             | 3.68          | 3.3 (-10)         | 3.69 (0.3)        | 2.16           | 1.92 (-11)         | 2.16 (0.0)        | 0.972           | 0.860 (-12)        | 0.968 (-0.4)       |
| O12             | 4.48          | 2.96 (-34)        | 4.50 (0.4)        | 2.20           | 1.45 (-34)         | 2.21 (0.4)        | 1.44            | 0.943 (-34)        | 1.44 (0.0)         |
| <b>GM model</b> | <b>2.84</b>   | <b>2.26 (-20)</b> | <b>2.90 (2.1)</b> | <b>1.63</b>    | <b>1.29 (-21)</b>  | <b>1.67 (2.4)</b> | <b>1.01</b>     | <b>0.778 (-23)</b> | <b>1.03 (2.0)</b>  |

<sup>1</sup>Shown are individual reference values and geometric mean (population) model-predicted values for *FaS* at 4, 7, and 14 d calculated after modeling plasma retinol kinetic data from 3 h to 365 d ("Reference") for 12 theoretical subjects [children (C1 – C4), younger adults (Y5 – Y8), and older adults (O9 – O12)] as well as values calculated using data modeled to 28 d for the children and to 56 d for the adults, without (-DI) and with inclusion of dietary intake data during modeling (+DI). Population modeling was done using geometric mean plasma retinol kinetic data calculated for each of the 3 groups of subjects; compare values to the geometric mean of the individual model-predicted *FaS* at 4, 7, and 14 d for the group of children (2.63, 1.38, and 0.682), younger adults (1.73, 1.21, and 0.899), and older adults (3.05, 1.74, and 1.02). Also shown are values for percent change (% Δ) in *FaS* predicted without or with DI compared to the reference value, calculated as [(reference value – value predicted without or with DI) / reference value] × 100. For the RID coefficient *FaS*, *Fa* is the fraction of the oral vitamin A dose found in the body's extravascular vitamin A pool at 4, 7, or 14 d (fraction of the dose in compartments 6 plus 7; Figure 1) and *S* is retinol specific activity in plasma divided by that in stores (specific activity in compartment 5 / specific activity in compartments 6 plus 7) at that time. Subjects are described in Supplemental Table 1. RID, retinol isotope dilution; DI, dietary intake; GM, geometric mean.

## Supplemental Figure 1

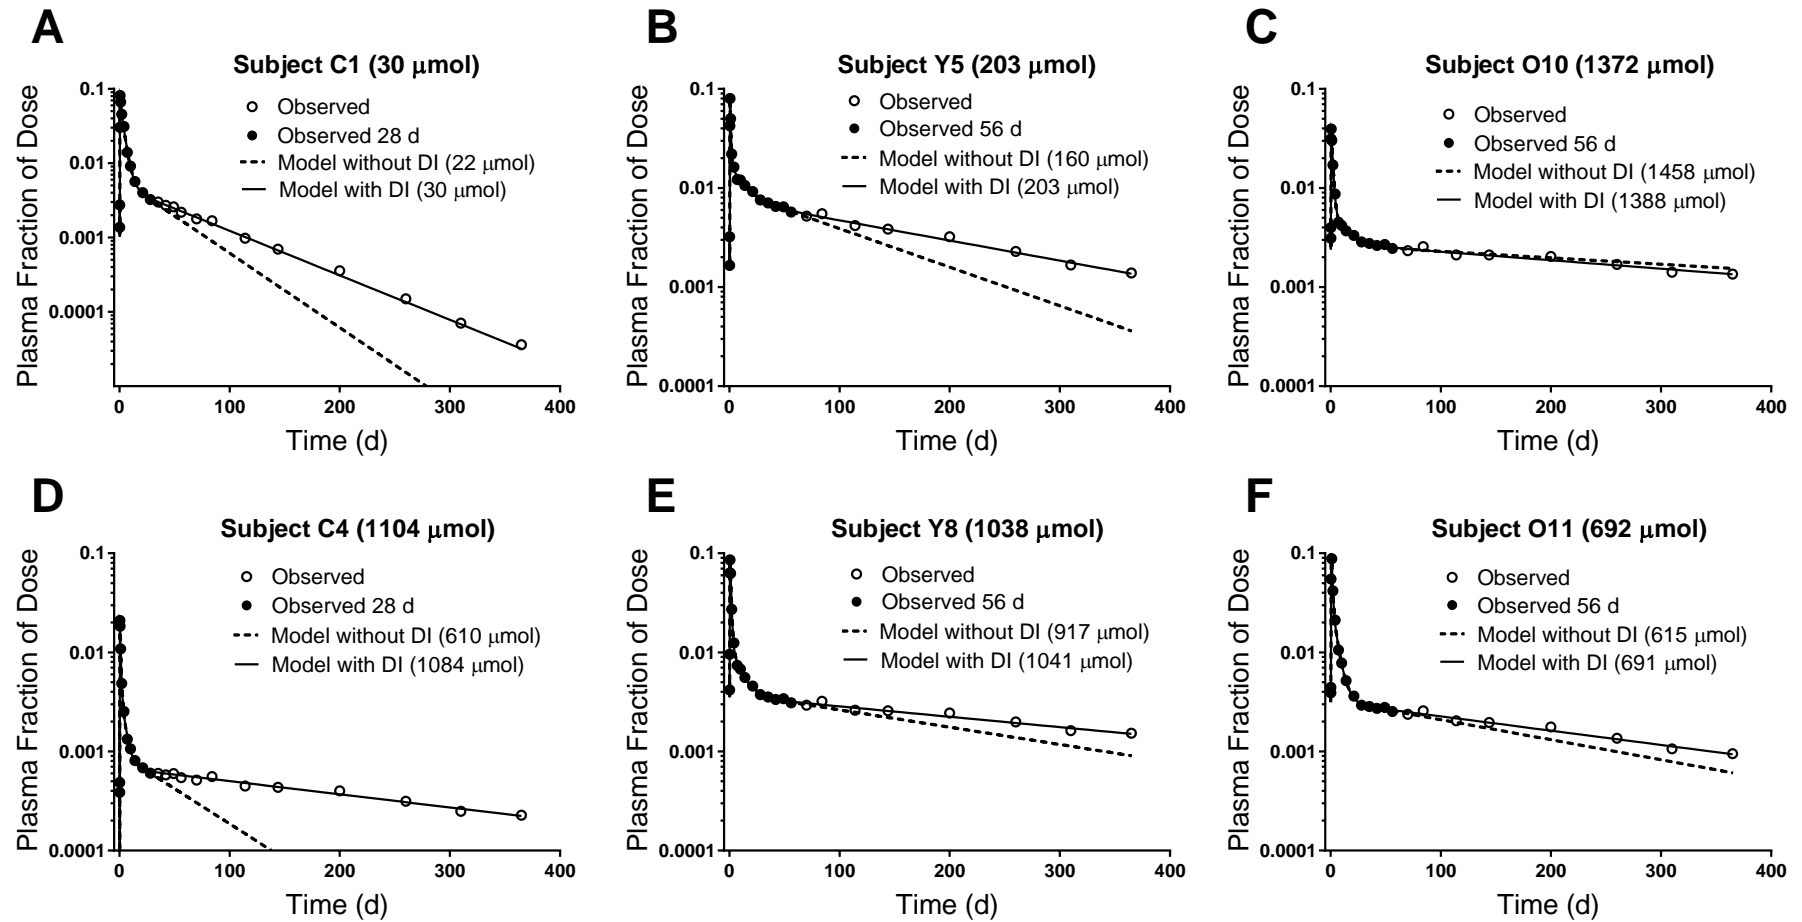

**Supplemental Figure 1.** Theoretical observed plasma retinol tracer response data versus time and model-calculated curves without and with the addition of dietary vitamin A intake as an input during compartmental modeling for 2 theoretical children [C1 (A) and C4 (D); Supplemental Table 1], 2 younger adults [Y5 (B) and Y8 (E)], and 2 older adults [O10 (C) and O11 (F)]. Shown are data to 365 d as well as the model fits to durations of 28 d for children and 56 d for adults without and with intake included. Reference values for TBS ( $\mu\text{mol}$ ) are indicated as are TBS predictions without and with intake included. DI, dietary intake; TBS, total body stores.

Supplemental Figure 2

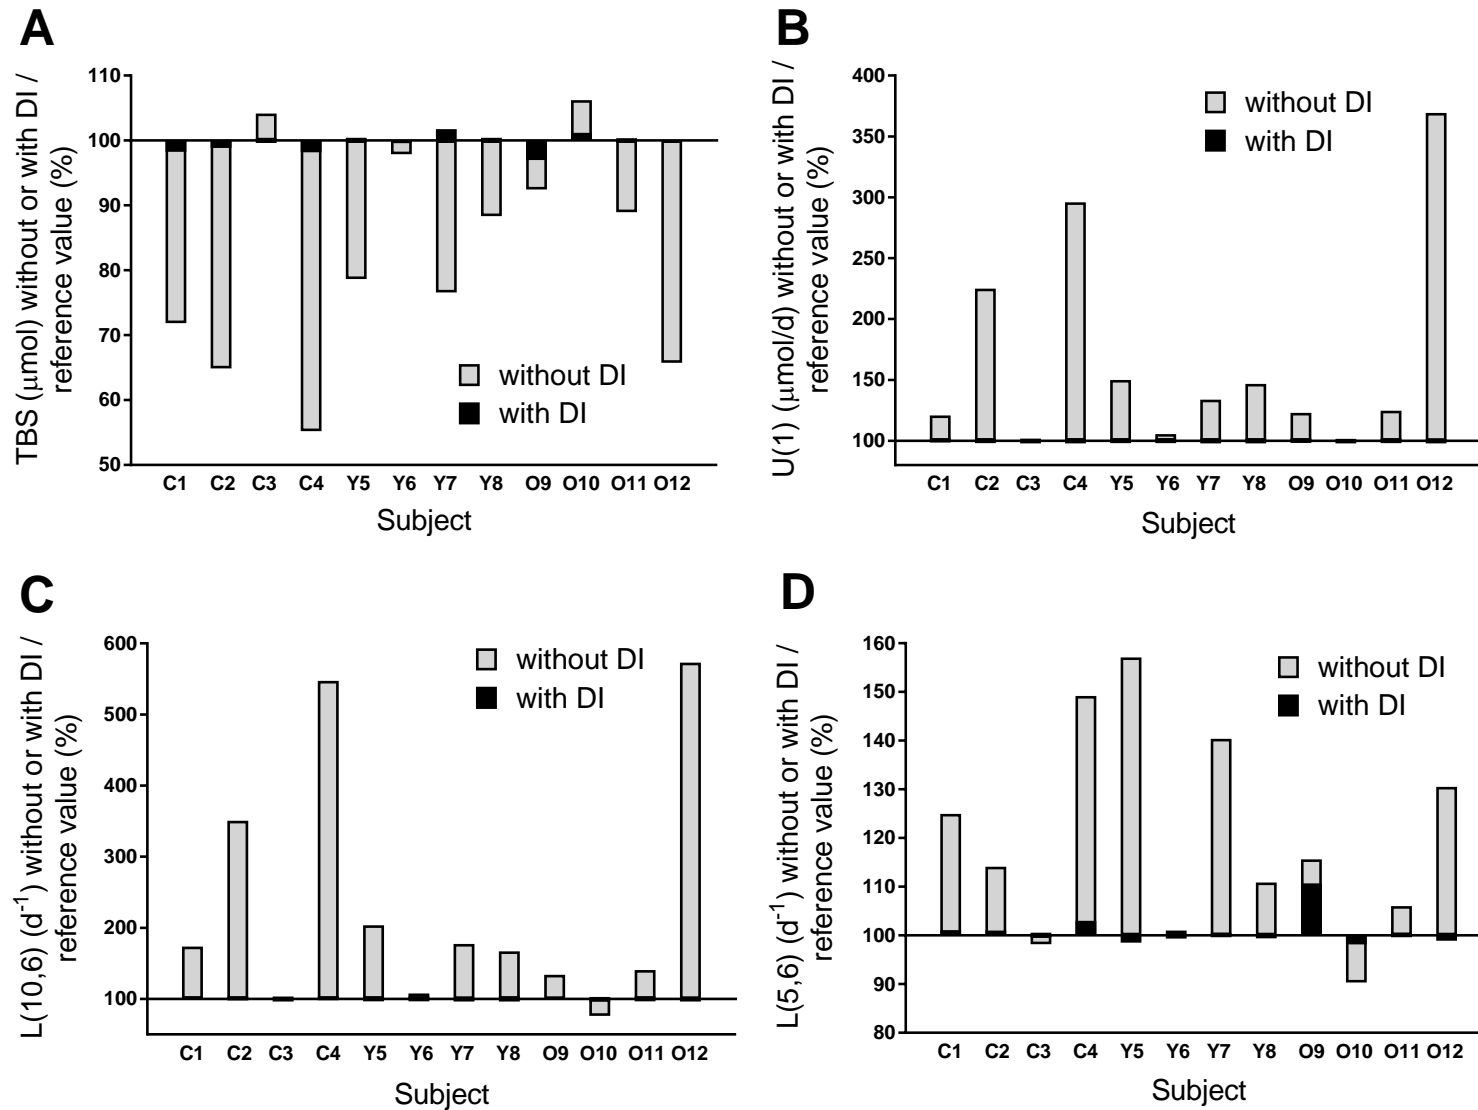

**Supplemental Figure 2.** Predicted values for the 2 state variables TBS (A) and model-predicted vitamin A intake [U(1), Figure 1; B] and for 2 retinol kinetic parameters, L(10,6) (C) and L(5,6) (D), as percent of reference values for 12 theoretical human subjects. Predicted values were calculated without and with dietary vitamin A intake included during modeling of data to 28 d for the 4 theoretical children (C1 – C4) and to 56 d for the younger (Y5 – Y8) and older adults (O9 – O12); reference values were obtained from modeling data to 365 d (Supplemental Table 1). DI, dietary intake; TBS, total body stores.

## Supplemental WinSAAM Deck

```

A SAAM31          Y7 2EV FFE 114D          [4-JAN-19]
CC YOUNGER ADULT; 22 YR; [ROH] = 1.4 UMOL/L; INTAKE = 1100 UG RAE/D; BW = 60 KG
CC 7-COMPARTMENT MODEL WITH LOSS FROM ONLY COMPARTMENT 6
CC 2 EXTRAVASCULAR POOLS: COMPARTMENT 6 (LARGER) AND COMPARTMENT 7 (SMALLER)
CC FIXED FRONT END: FIXED L(2,1) AND L(5,2) AT REFERENCE VALUES
CC PARAMETERS
H PAR
CC          VALUE          LOWER LIMIT    UPPER LIMIT
CC IC(I)=INITIAL CONDITION (FRACTION OF DOSE) IN COMPARTMENT I AT TIME 0
   IC(1)=1
CC L(I,J)=FRACTION OF J TRANSFERRED TO I PER DAY (DAY^-1)
   L(2,1)    6.052309E+01
CC L(0,1)=FRACTIONAL LOSS OF UNABSORBED TRACER
CC ASSUMING 75% ABSORPTION EFFICIENCY; L(0,1)=1/3 OF L(2,1)
   L(0,1)=0.333*L(2,1)
   L(3,2)=L(2,1)
   L(5,2)    8.232734E-01
CC DN(I)=NUMBER OF ELEMENTS IN DELAY COMPONENT I
CC DT(I)=DELAY TIME IN COMPONENT I (DAY)
   DN(3)     8
   DT(3)     1.280575E-01  0.000000E+00  1.000000E+02
CC OUTPUT FROM DELAY COMPONENT EQUALS 1
   L(4,3)=1
   L(5,4)    9.624985E-01  0.000000E+00  1.000000E+02
   L(6,5)    2.934716E+00  0.000000E+000  1.000000E+02
   L(5,6)    1.612310E-02  0.000000E+00  1.000000E+02
CC L(10,6)=FRACTIONAL CATABOLIC RATE OF COMPARTMENT 6;
CC COMPARTMENT 10 IS LOSS FROM THE SYSTEM
   L(10,6)   6.692401E-03  0.000000E+00  1.000000E+02
   L(7,5)    4.131773E+00  0.000000E+00  1.000000E+02
   L(5,7)    1.934754E-01  0.000000E+0000 1.000000E+02
CC STEADY STATE SOLUTION
CC U(I)=VITAMIN A INTAKE RATE (UMOL/D)
CC M(I)=MASS OF VITAMIN A IN COMPARTMENT I (UMOL)
H STE
C REFERENCE VALUE FOR DIETARY INTAKE = 3.99 UMOL RAE/D
   U(1)     4.188332E+00  0          100
CC M(5)=PLASMA RETINOL POOL (UMOL)
   M(5)     3.65
CC MODEL-PREDICTED MASSES IN COMPARTMENTS 6 & 7
CC M(6)=469 UMOL
CC M(7)=78 UMOL
CC DATA
H DAT
CC PLASMA RETINOL FRACTION OF TRACER DOSE
CC THEORETICAL OBSERVED DATA WITH ERROR ADDED
CC          FRACTIONAL STANDARD DEVIATION
105          FSD=0.05
CC          TIME (D)          FRACION OF DOSE
          0          0
          0.125        0.00504731
          0.208        0.0320467
          0.333        0.0696177

```



|     |            |
|-----|------------|
| 0.5 | 0.0758015  |
| 1   | 0.0564934  |
| 2   | 0.028841   |
| 4   | 0.0146723  |
| 7   | 0.00852208 |
| 10  | 0.00790725 |
| 14  | 0.00657486 |
| 21  | 0.00527302 |
| 28  | 0.0041223  |
| 35  | 0.00370767 |
| 42  | 0.00333708 |
| 49  | 0.00326275 |
| 56  | 0.00286729 |
| 70  | 0.00256802 |
| 84  | 0.002692   |
| 114 | 0.00200409 |

CC TIMES EXCLUDED

CC MINIMUM TIME FOR ACCURATE PREDICTION OF VITAMIN A STORES [M(6)+M(7)] AND  
 CC KINETIC PARAMETERS WITHOUT DIETARY INTAKE INCLUDED DURING MODELING WAS 114 DAY  
 Y

|     |             |
|-----|-------------|
| 144 | 0.00181444  |
| 200 | 0.00146703  |
| 260 | 0.00100103  |
| 310 | 0.000708661 |
| 365 | 0.000567534 |

Y-

CC PLASMA SIMULATIONS

105

|   |      |    |
|---|------|----|
| 0 |      |    |
| 2 | 0.05 | 20 |
| 2 | 0.1  | 40 |
| 2 | 1    | 60 |
| 2 | 10   | 30 |

**A SAAM31                    Y7 2EV FFE 28D DI                    [4-JAN-19]**

CC YOUNGER ADULT; 22 YR; [ROH] = 1.4 UMOL/L; INTAKE = 1100 UG RAE/D; BW = 60 KG

CC 7-COMPARTMENT MODEL WITH LOSS FROM ONLY COMPARTMENT 6

CC 2 EXTRAVASCULAR POOLS: COMPARTMENT 6 (LARGER) AND COMPARTMENT 7 (SMALLER)

CC FIXED FRONT END: FIXED L(2,1) AND L(5,2) AT REFERENCE VALUES

CC REFERENCE VALUE FOR DIETARY VITAMIN A INTAKE INCLUDED

CC PARAMETERS

H PAR

|    |       |             |             |
|----|-------|-------------|-------------|
| CC | VALUE | LOWER LIMIT | UPPER LIMIT |
|----|-------|-------------|-------------|

CC IC(I)=INITIAL CONDITION (FRACTION OF DOSE) IN COMPARTMENT I AT TIME 0

IC(1)=1

CC L(I,J)=FRACTION OF J TRANSFERRED TO I PER DAY (DAY<sup>-1</sup>)

L(2,1)      6.052309E+01

CC L(0,1)=FRACTIONAL LOSS OF UNABSORBED TRACER

CC ASSUMING 75% ABSORPTION EFFICIENCY; L(0,1)=1/3 OF L(2,1)

L(0,1)=0.333\*L(2,1)

L(3,2)=L(2,1)

L(5,2)      8.232734E-01

CC DN(I)=NUMBER OF ELEMENTS IN DELAY COMPONENT I

CC DT(I)=DELAY TIME IN COMPONENT I (DAY)

DN(3)      8

DT(3)      1.277356E-01    0.000000E+00    1.000000E+02

```

CC OUTPUT FROM DELAY COMPONENT EQUALS 1
  L(4,3)=1
  L(5,4)  9.566745E-01  0.000000E+00  1.000000E+02
  L(6,5)  2.954797E+00  0.000000E+000  1.000000E+02
  L(5,6)  1.620557E-02  0.000000E+00  1.000000E+02
CC L(10,6)=FRACTIONAL CATABOLIC RATE OF COMPARTMENT 6;
CC COMPARTMENT 10 IS LOSS FROM THE SYSTEM
  L(10,6)  6.232547E-03  0.000000E+00  1.000000E+02
  L(7,5)  4.104903E+00  0.000000E+00  1.000000E+02
  L(5,7)  1.924474E-01  0.000000E+0000  1.000000E+02
CC STEADY STATE SOLUTION
CC U(I)=VITAMIN A INTAKE RATE (UMOL/D)
CC M(I)=MASS OF VITAMIN A IN COMPARTMENT I (UMOL)
H STE
C REFERENCE VALUE FOR DIETARY INTAKE = 3.99 UMOL RAE/D
  U(1)  3.993281E+00  0  100
CC M(5)=PLASMA RETINOL POOL (UMOL)
  M(5)  3.65
CC MODEL-PREDICTED MASSES IN COMPARTMENTS 6 & 7
CC M(6)=481 UMOL
CC M(7)=78 UMOL
CC DATA
H DAT
CC WEIGHTED U(1) AT REFERENCE VALUE FOR DIETARY VITAMIN A INTAKE
CC      TIME (D)      U(1)      FRACTIONAL STANDARD DEVIATION
100
  U(1)  0      3.99      FSD=0.05
CC PLASMA RETINOL FRACTION OF TRACER DOSE
CC THEORETICAL OBSERVED DATA WITH ERROR ADDED
CC      FRACTIONAL STANDARD DEVIATION
105      FSD=0.05
CC      TIME (D)      FRACION OF DOSE
  0      0
  0.125  0.00504731
  0.208  0.0320467
  0.333  0.0696177
  0.5    0.0758015
  1      0.0564934
  2      0.028841
  4      0.0146723
  7      0.00852208
  10     0.00790725
  14     0.00657486
  21     0.00527302
  28     0.0041223
CC TIMES EXCLUDED
CC MINIMUM TIME FOR ACCURATE PREDICTION OF VITAMIN A STORES [M(6)+M(7)] AND
CC KINETIC PARAMETERS WITH DIETARY INTAKE INCLUDED DURING MODELING WAS 28 DAY
Y
  35     0.00370767
  42     0.00333708
  49     0.00326275
  56     0.00286729
  70     0.00256802
  84     0.002692
  114    0.00200409

```

|     |             |
|-----|-------------|
| 144 | 0.00181444  |
| 200 | 0.00146703  |
| 260 | 0.00100103  |
| 310 | 0.000708661 |
| 365 | 0.000567534 |

Y-  
CC PLASMA SIMULATIONS

105

|   |      |    |
|---|------|----|
|   | 0    |    |
| 2 | 0.05 | 20 |
| 2 | 0.1  | 40 |
| 2 | 1    | 60 |
| 2 | 10   | 30 |

**Supplemental References**

1. Linderkamp O, Versmold HT, Riegel KP, Betke K. Estimation and prediction of blood volume in infants and children. *Eur J Pediatr* 1977;125:227-34.
2. Hahn RG. Blood volumes and fluid kinetics. In: Hahn RG, editor. *Clinical fluid therapy in the perioperative setting*. Cambridge (UK): Cambridge University Press; 2011. p. 127 – 36.
3. Green MH, Green JB. Vitamin A intake and status influence retinol balance, utilization and dynamics in rats. *J Nutr* 1994;124:2477-85.
4. Oxley A, Berry P, Taylor GA, Cowell J, Hall MJ, Hesketh J, Lietz G, Boddy AV. An LC/MS/MS method for stable isotope dilution studies of  $\beta$ -carotene bioavailability, bioconversion, and vitamin A status in humans. *J Lipid Res* 2014;55:319-28.
